# Supplementary material for: An aggregation-induced emission-based fluorescence turn-on probe for Hg2+ and its application to detect Hg2+ in food samples
Source: Royal Society of Chemistry journal article supplement (doi:10.1039/c9ra04440j), 2019-01-01
Supplement: c9ra04440j1.pdf [file c9ra04440j1.pdf]

## *Electronic Supplementary Information*

### **An aggregation-induced emission-based fluorescence turn-on probe for Hg<sup>2+</sup> and its application to detect Hg<sup>2+</sup> in food samples**

Lijun Tang,<sup>a,\*</sup> Haili Yu,<sup>a</sup> Keli Zhong,<sup>a</sup> Xue Gao,<sup>b</sup> Jianrong Li<sup>b,\*</sup>

<sup>a</sup> College of Chemistry and Chemical Engineering, Bohai University, Jinzhou, 121013, China. E-mail: ljtang@bhu.edu.cn (L. Tang)

<sup>b</sup> College of Food Science and Technology, Bohai University; National & Local Joint Engineering Research Center of Storage, Processing and Safety Control Technology for Fresh Agricultural and Aquatic Products; The Fresh Food Storage and Processing Technology Research Institute of Liaoning Provincial Universities, Jinzhou, 121013, China. E-mail: lijr6491@163.com (J. Li)

#### **Sample pretreatment**

##### *1. Pretreatment of shrimp and crab meat samples*

Shrimp and crab were purchased from the supermarket and the meat was firstly treated with a digestion procedure. Each sample (0.5 g) was soaked overnight in a beaker with HNO<sub>3</sub> (10 mL) at room temperature, then mixture was heated to boil until it was completely dissolved. After cooling, the solution was centrifuged, and the supernatant was adjusted to pH = 7.4 with 1M NaOH solution, and constant the volume to 50 mL a 50 mL volumetric flask.

##### *2. Pretreatment of tea samples*

0.500 g of mashed tea was placed in a 100 mL beaker, to which 20 mL of concentrated nitric acid was added separately. The beaker was sealed with a plastic wrap and placed overnight. Then it was put in a microwave oven and digested 6h under 400 W of power. It was then placed in a fume hood to cool, and the supernatant was adjusted to pH = 7.4 with 1 M NaOH solution. Then the solution was transferred to a 100 mL volumetric flask and brought up to volume.

## Supplementary figures

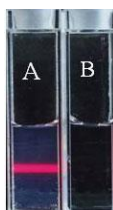

**Fig. S1.** Photograph of Tyndall phenomena of a  $\text{CH}_3\text{OH}/\text{PBS}$  (20 mM, pH = 7.4) (3:7, v/v) solution with (A) and without (B) compound **4** via illuminating with a laser pointer.

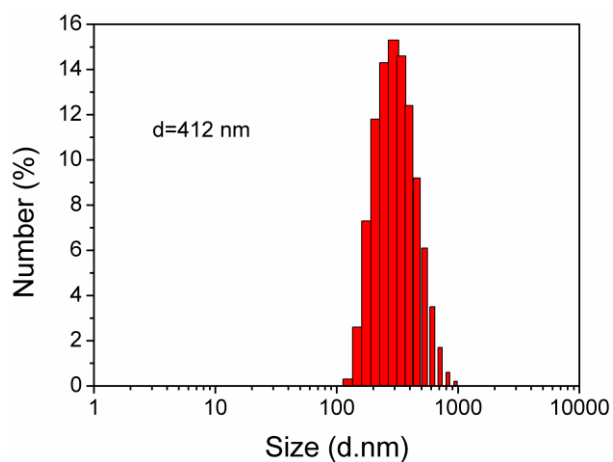

**Fig. S2.** Particle size distributions of compound **4** in  $\text{CH}_3\text{OH}/\text{PBS}$  (20 mM, pH = 7.4) (3:7, v/v) solution.

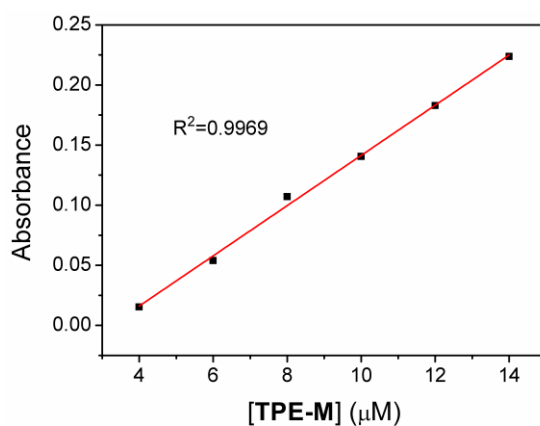

**Fig. S3.** The linear relationship between absorbance and **TPE-M** concentration in  $\text{CH}_3\text{OH}/\text{PBS}$  (20 mM, pH = 7.4) (3:7, v/v) solution.

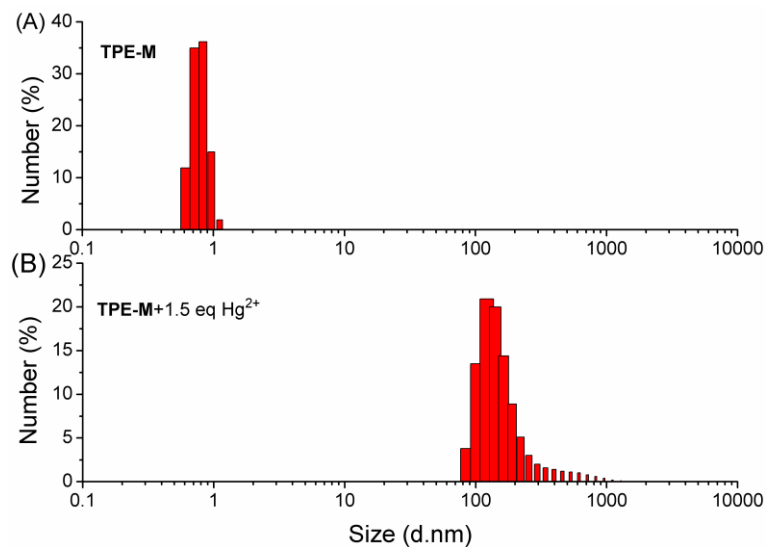

**Fig. S4.** Particle size distributions of **TPE-M** in CH<sub>3</sub>OH/PBS (20 mM, pH = 7.4) (3:7, v/v) solution before (A) and after (B) addition of Hg<sup>2+</sup>.

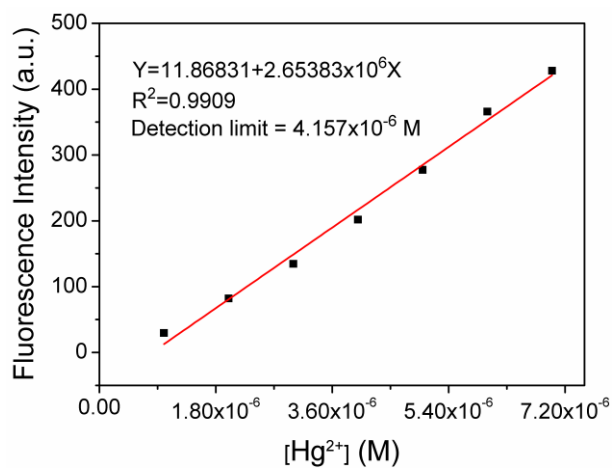

**Fig. S5.** Standard calibration curve of emission intensity of probe **TPE-M** against Hg<sup>2+</sup> concentrations (0 to 15 μM) in CH<sub>3</sub>OH/PBS (20 mM, pH = 7.4) (3:7, v/v) solution.

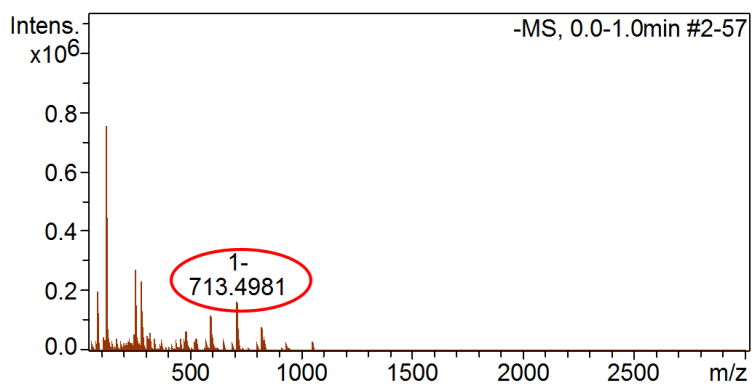

**Fig. S6.** HRMS (ESI+) spectrum of **TPE-M**+Hg<sup>2+</sup>.

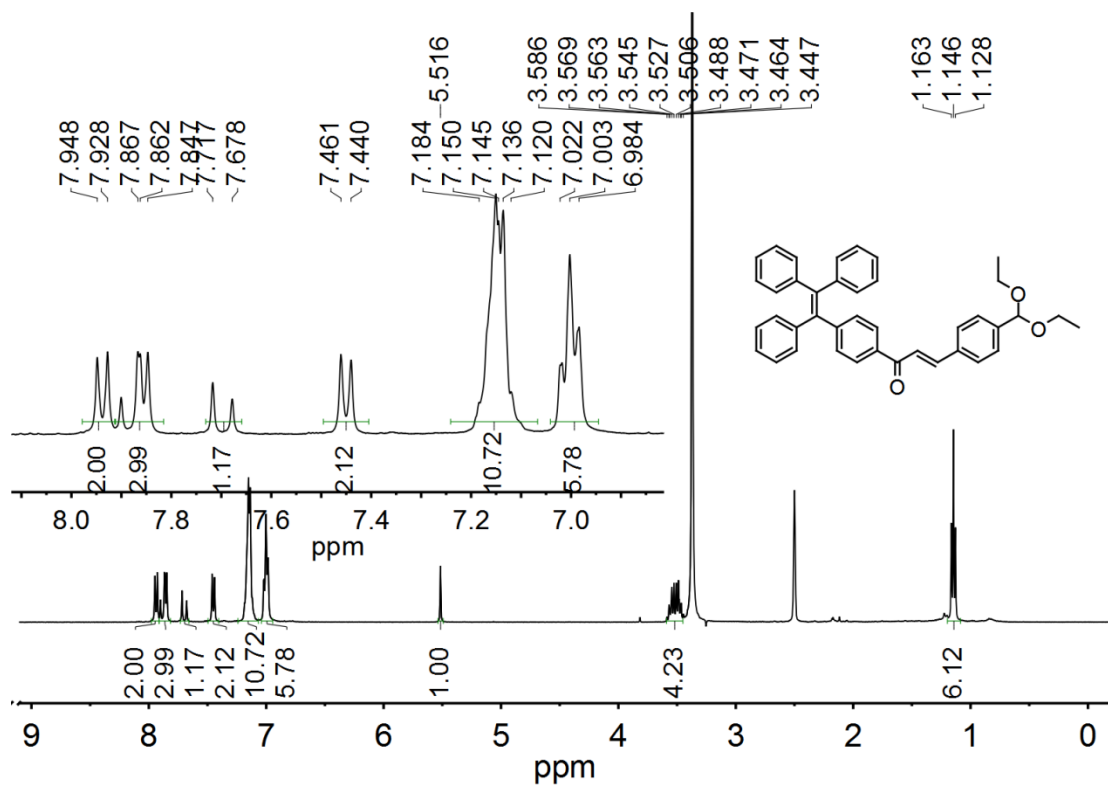

**Fig. S7.** <sup>1</sup>H NMR spectrum of Compound **3** in DMSO-*d*<sub>6</sub>.

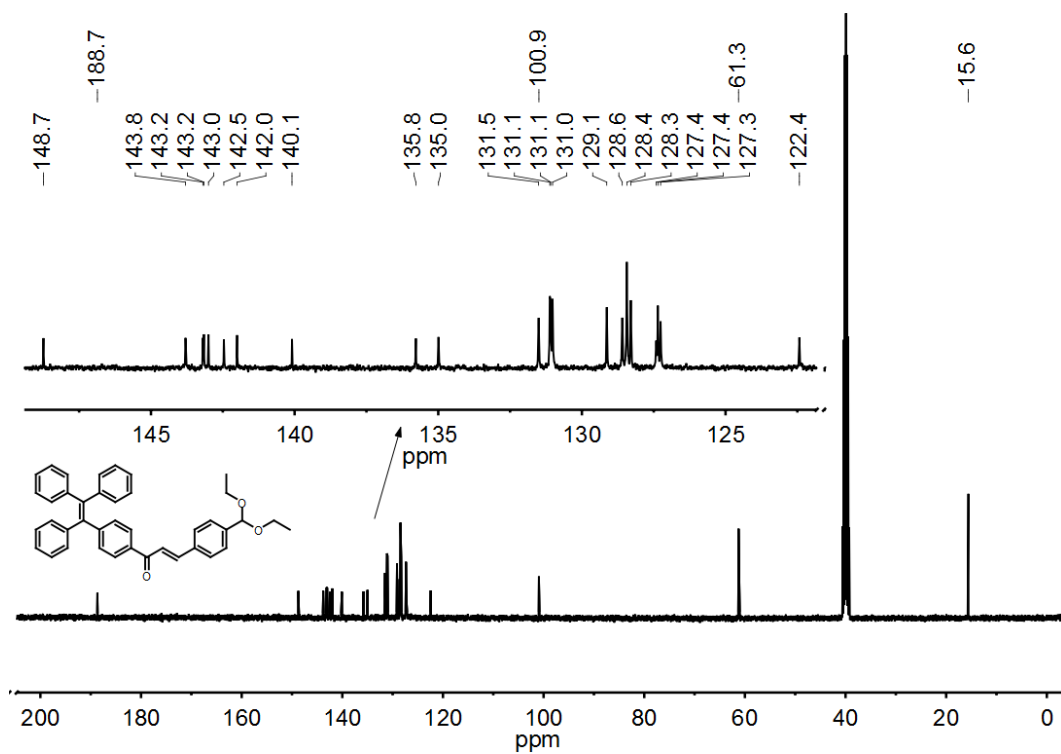

**Fig. S8.** <sup>13</sup>C NMR spectrum of compound **3** in DMSO-*d*<sub>6</sub>.

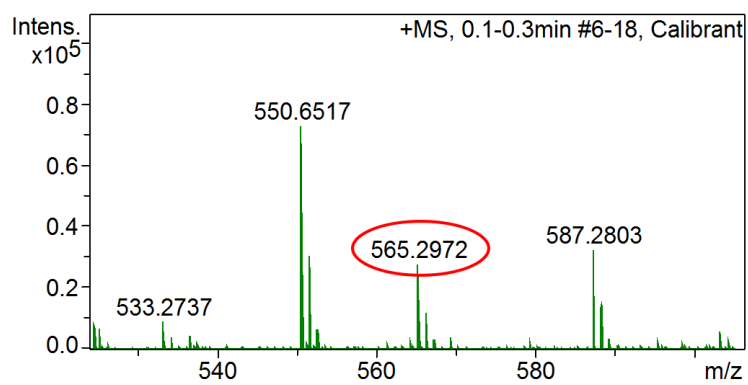

**Fig. S9.** HRMS (ESI+) spectrum of compound **3**.

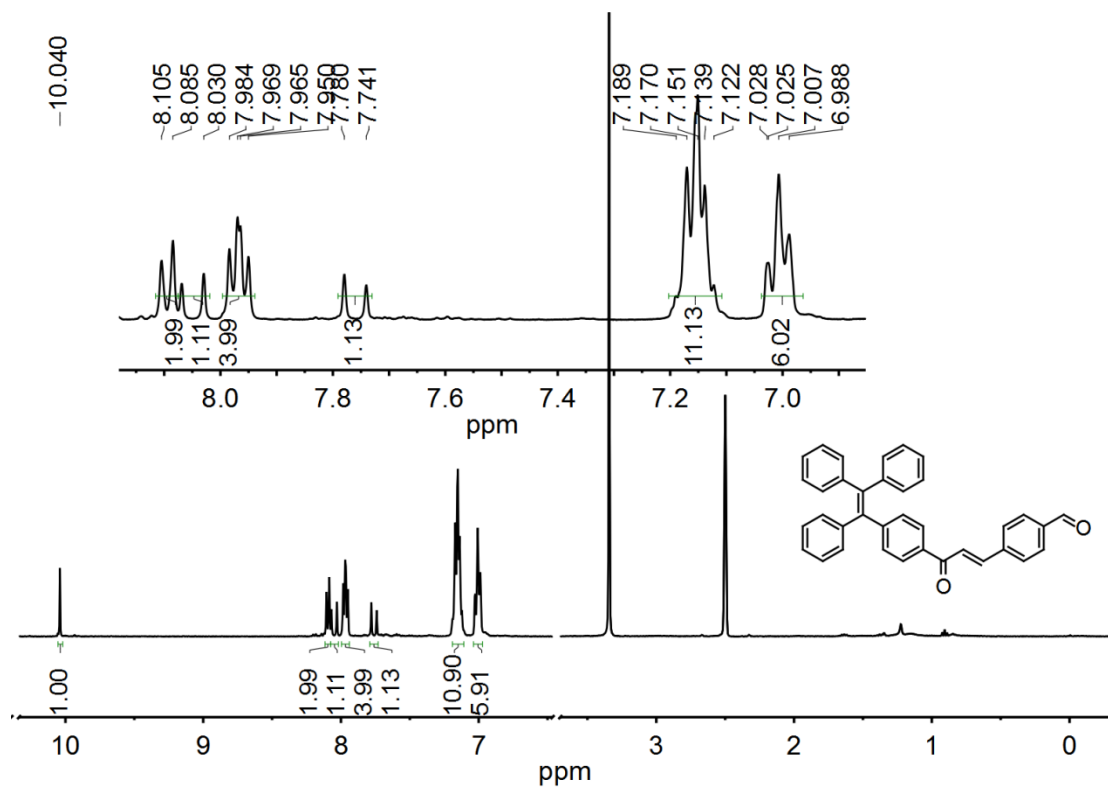

**Fig. S10.** <sup>1</sup>H NMR spectrum of compound 4 in DMSO-*d*<sub>6</sub>.

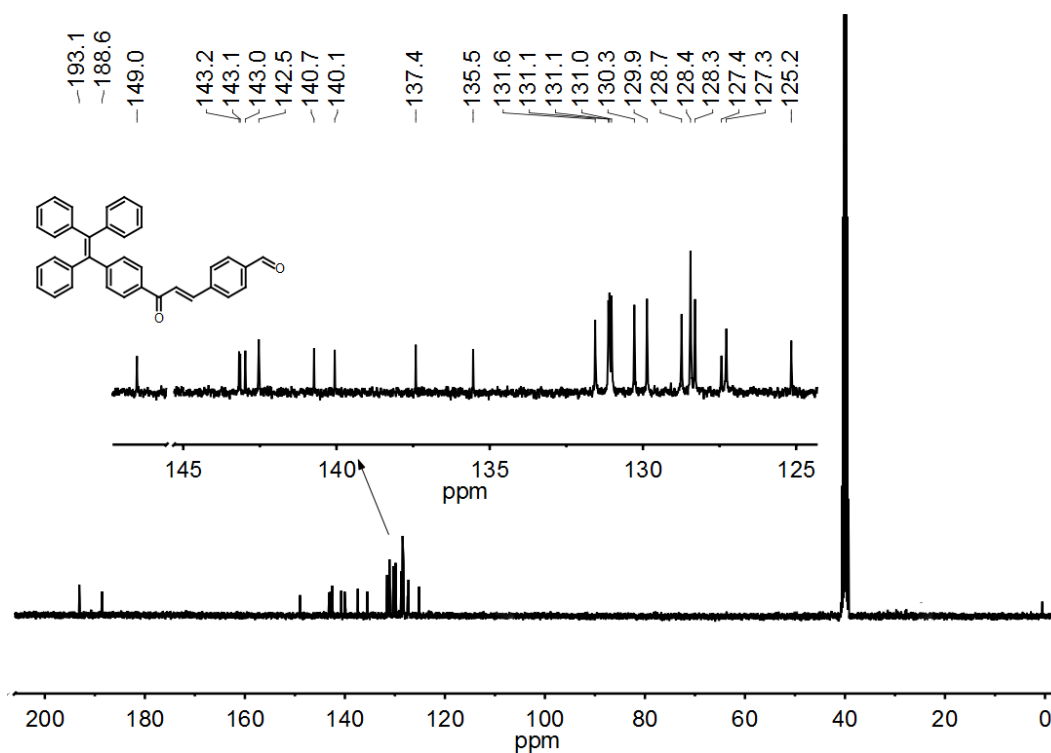

**Fig. S11.** <sup>13</sup>C NMR spectrum of compound 4 in DMSO-*d*<sub>6</sub>.

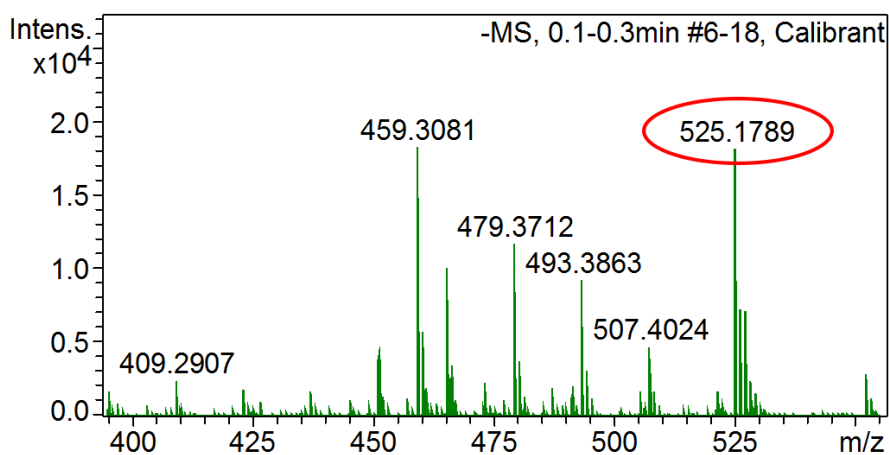

**Fig. S12.** HRMS (ESI-) spectrum of compound **4**.

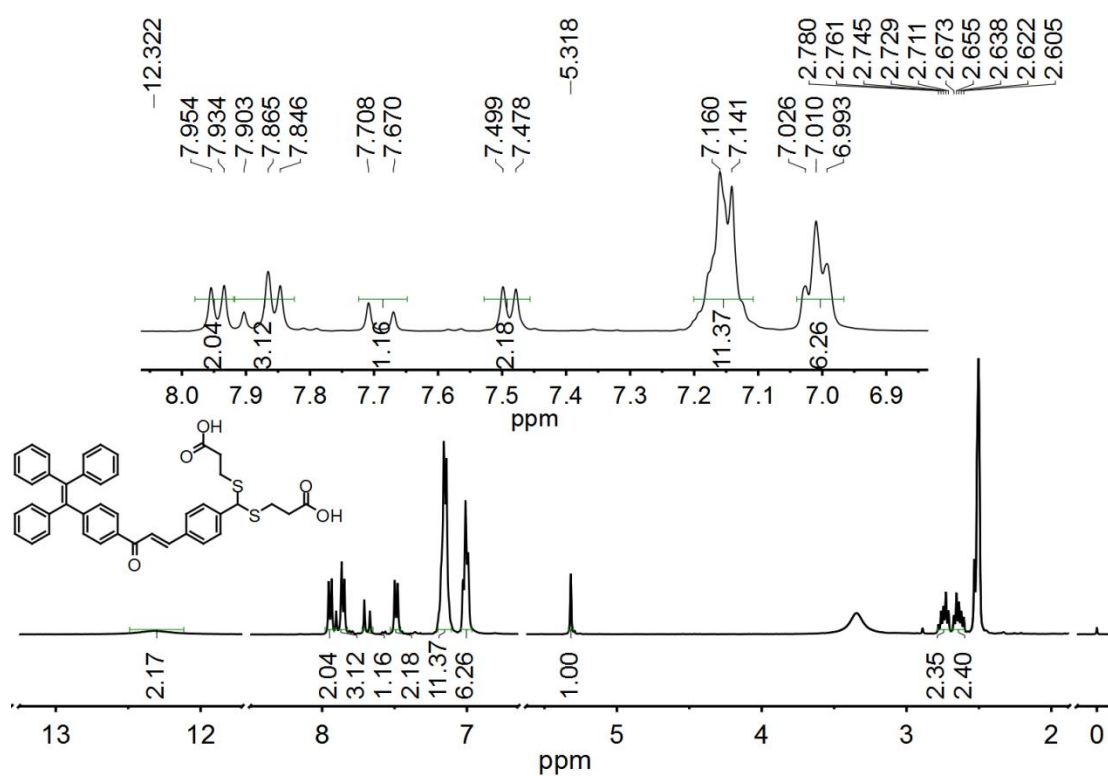

**Fig. S13.** <sup>1</sup>H NMR spectrum of probe **TPE-M** in DMSO-*d*<sub>6</sub>.

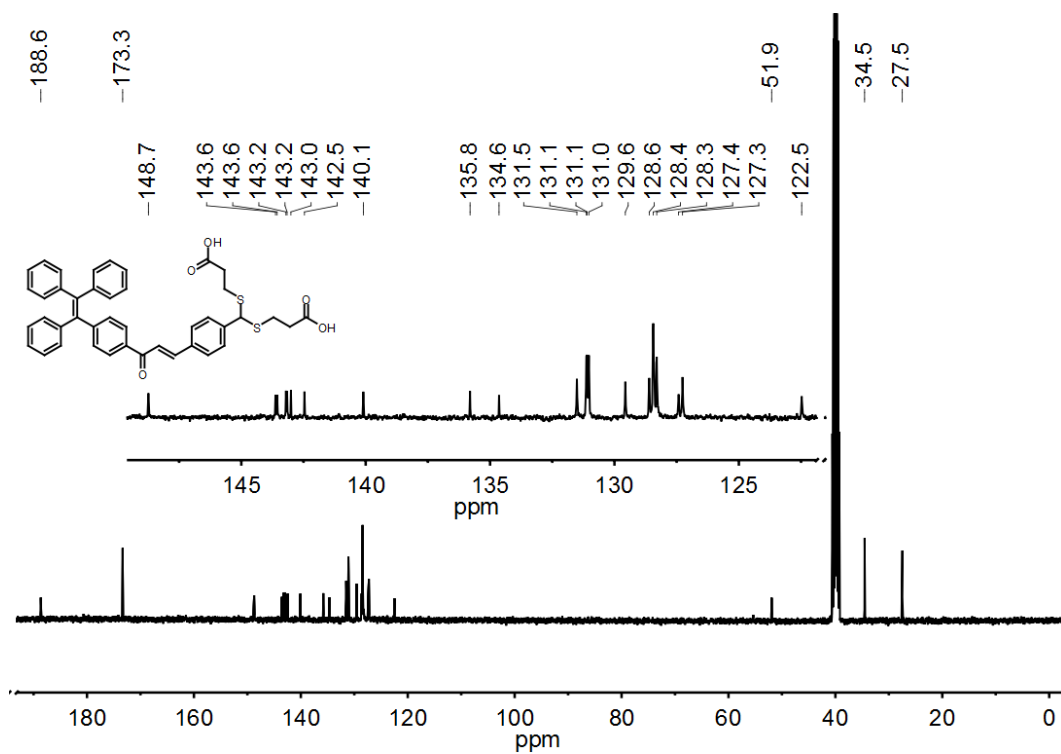

**Fig. S14.**  $^{13}\text{C}$  NMR spectrum of probe TPE-M in DMSO- $d_6$ .

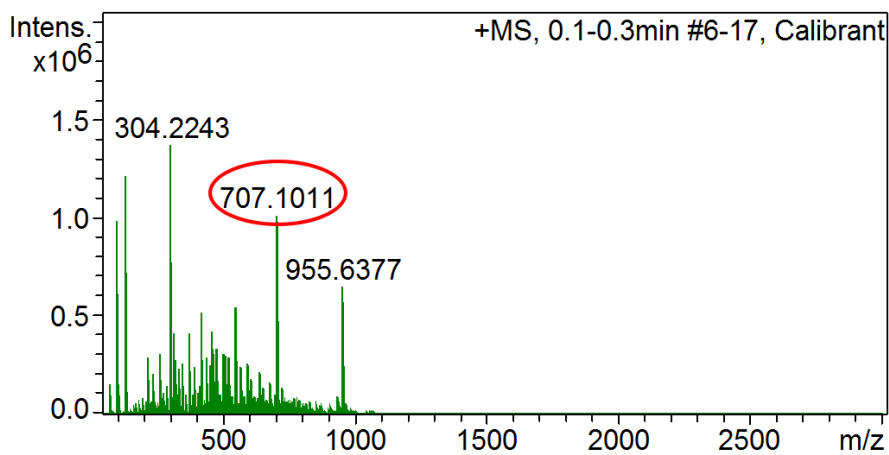

**Fig. S15.** HRMS (ESI+) spectrum of probe TPE-M.
